# Supplementary material for: Dicer-2-Dependent Activation of Culex Vago Occurs via the TRAF-Rel2 Signaling Pathway
Source: PLoS Negl Trop Dis. 2014 Apr 24;8(4):e2823. doi: 10.1371/journal.pntd.0002823 (PMC3998923; doi:10.1371/journal.pntd.0002823)
Supplement: Table S1 — Transcription factor binding sites on Culex Vago promoter region predicted by PROMO software. Footprinter2.0 was used to predict sites conserved between Culex, Aedes and Anopholes promoters. The conserved sites are in bold. (DOCX) [file pntd.0002823.s006.docx]

**Supplementary Table 1:**

Transcription factor list from PROMO:

| | **Factor name** | **Start position** | **End position** | | --- | --- | --- | | C/EBPbeta [T00017] | -2014 | -2007 | | C/EBPbeta [T00017] | -1204 | -1197 | | C/EBPbeta [T00017] | -908 | -901 | | C/EBPbeta [T00017] | -588 | -581 | | C/EBPbeta [T00017] | -388 | -381 | | C/EBPbeta [T00017] | -18 | -11 | | USF-1 [T00875] | -1659 | -1653 | | USF-1 [T00875] | -1526 | -1520 | | USF-1 [T00875] | -472 | -466 | | USF-1 [T00875] | -448 | -442 | | USF-1 [T00875] | -358 | -352 | | Pax-2 [T01823] | -1967 | -1961 | | Pax-2 [T01823] | -728 | -722 | | Pax-2 [T01823] | -642 | -636 | | Pax-2 [T01823] | -500 | -494 | | Pax-8 [T01828] | -1966 | -1961 | | Pax-8 [T01828] | -1685 | -1680 | | Pax-8 [T01828] | -1279 | -1274 | | Pax-8 [T01828] | -1197 | -1192 | | Pax-8 [T01828] | -1190 | -1185 | | Pax-8 [T01828] | -1131 | -1126 | | Pax-8 [T01828] | -1047 | -1042 | | Pax-8 [T01828] | -978 | -973 | | Pax-8 [T01828] | -370 | -365 | | Pax-8 [T01828] | -41 | -36 | | c-Jun [T00131] | -1969 | -1964 | | c-Jun [T00131] | -1798 | -1793 | | c-Jun [T00131] | -1765 | -1760 | | c-Jun [T00131] | -1636 | -1631 | | c-Jun [T00131] | -893 | -888 | | c-Jun [T00131] | -725 | -720 | | c-Jun [T00131] | -484 | -479 | | GATA-1 [T00305] | -1905 | -1898 | | GATA-1 [T00305] | -598 | -591 | | **GATA-1 [T00305]** | -171 | -164 | | TFIIB [T00818] | -1897 | -1890 | | TFIIB [T00818] | -1366 | -1359 | | TFIIB [T00818] | -1345 | -1338 | | TFIIB [T00818] | -1045 | -1038 | | TFIIB [T00818] | -899 | -892 | | TFIIB [T00818] | -664 | -657 | | TBP [T00798] | -1844 | -1837 | | TBP [T00798] | -1186 | -1179 | | TBP [T00798] | -816 | -809 | | TBP [T00798] | -427 | -420 | | TBP [T00798] | -165 | -158 | | Vpr [T02399] | -1762 | -1755 | | Vpr [T02399] | -1503 | -1496 | | Vpr [T02399] | -460 | -453 | | NF-1 [T00538] | -1508 | -1501 | | NF-1 [T00538] | -1488 | -1481 | | NF-1 [T00538] | -1087 | -1080 | | NF-1 [T00538] | -1056 | -1049 | | NF-1 [T00538] | -1005 | -998 | | NF-1 [T00538] | -869 | -862 | | NF-1 [T00538] | -322 | -315 | | Sox2 [T01836] | -1978 | -1972 | | Sox2 [T01836] | -1697 | -1691 | | Sox2 [T01836] | -1418 | -1412 | | Sox2 [T01836] | -1266 | -1260 | | Sox2 [T01836] | -992 | -986 | | Sox2 [T01836] | -725 | -719 | | Sox2 [T01836] | -304 | -298 | | Sox2 [T01836] | -65 | -59 | | TFIID [T00820] | -1742 | -1735 | | TFIID [T00820] | -1190 | -1183 | | TFIID [T00820] | -1184 | -1177 | | TFIID [T00820] | -408 | -401 | | Antp [T00026] | -187 | -182 | | Antp [T00026] | -183 | -178 | | Antp [T00026] | -105 | -100 | | Antp [T00026] | -73 | -68 | | STAT1beta [T01573] | -1834 | -1825 | | STAT1beta [T01573] | -1357 | -1348 | | STAT1beta [T01573] | -362 | -353 | | TBP [T00794] | -412 | -405 | | TBP [T00794] | -408 | -401 | | FOXN2 [T04206] | -1466 | -1456 | | HNF-1 [T00369] | -1387 | -1376 | | C/EBPalpha [T00104] | -1551 | -1546 | | C/EBPalpha [T00104] | -97 | -92 | | C/EBPalpha [T00104] | -14 | -9 | | Hlf [T01071] | -962 | -954 | | Hlf [T01071] | -440 | -432 | | Hlf [T01071] | -287 | -279 | | HBP-1 [T00354] | -936 | -929 | | NF-Y [T00150] | -1647 | -1640 | | FOXO4 [T04176] | -521 | -512 | | FOXO4 [T04176] | -105 | -96 | | AP-1 [T00031] | -501 | -491 | | **Rel [T00594]** | -267 | -258 | | STAT6 [T01581] | -263 | -255 | | FOXO1 [T04203] | -283 | -273 | | FOXO1 [T04203] | -239 | -229 | | FOXO1 [T04203] | -201 | -191 | | c-Ets-1 [T00111] | -1599 | -1590 | | c-Ets-1 [T00111] | -266 | -257 | | USF-1 [T00877] | -627 | -617 | | TFII-I [T00824] | -1771 | -1761 | | Smad3 [T04096] | -2005 | -1996 | | Smad4 [T04292] | -2006 | -1996 | |  |  |  | |
| --- | --- | --- | --- | --- | --- | --- | --- | --- | --- | --- | --- | --- | --- | --- | --- | --- | --- | --- | --- | --- | --- | --- | --- | --- | --- | --- | --- | --- | --- | --- | --- | --- | --- | --- | --- | --- | --- | --- | --- | --- | --- | --- | --- | --- | --- | --- | --- | --- | --- | --- | --- | --- | --- | --- | --- | --- | --- | --- | --- | --- | --- | --- | --- | --- | --- | --- | --- | --- | --- | --- | --- | --- | --- | --- | --- | --- | --- | --- | --- | --- | --- | --- | --- | --- | --- | --- | --- | --- | --- | --- | --- | --- | --- | --- | --- | --- | --- | --- | --- | --- | --- | --- | --- | --- | --- | --- | --- | --- | --- | --- | --- | --- | --- | --- | --- | --- | --- | --- | --- | --- | --- | --- | --- | --- | --- | --- | --- | --- | --- | --- | --- | --- | --- | --- | --- | --- | --- | --- | --- | --- | --- | --- | --- | --- | --- | --- | --- | --- | --- | --- | --- | --- | --- | --- | --- | --- | --- | --- | --- | --- | --- | --- | --- | --- | --- | --- | --- | --- | --- | --- | --- | --- | --- | --- | --- | --- | --- | --- | --- | --- | --- | --- | --- | --- | --- | --- | --- | --- | --- | --- | --- | --- | --- | --- | --- | --- | --- | --- | --- | --- | --- | --- | --- | --- | --- | --- | --- | --- | --- | --- | --- | --- | --- | --- | --- | --- | --- | --- | --- | --- | --- | --- | --- | --- | --- | --- | --- | --- | --- | --- | --- | --- | --- | --- | --- | --- | --- | --- | --- | --- | --- | --- | --- | --- | --- | --- | --- | --- | --- | --- | --- | --- | --- | --- | --- | --- | --- | --- | --- | --- | --- | --- | --- | --- | --- | --- | --- | --- | --- | --- | --- | --- | --- | --- | --- | --- | --- | --- | --- | --- | --- | --- | --- | --- | --- | --- | --- | --- | --- | --- | --- | --- | --- | --- | --- | --- | --- | --- | --- | --- | --- | --- | --- | --- | --- | --- | --- | --- | --- |
